# Supplementary material for: Strychnine and its mono- and dimeric analogues: a pharmaco-chemical perspective
Source: Royal Society of Chemistry journal article supplement (doi:10.1039/d1np00079a), 2022-01-01
Supplement: d1np00079a1.pdf [file d1np00079a1.pdf]

*Electronic Supplementary Information*

## **Strychnine and its mono- and dimeric analogues: A pharmaco-chemical perspective**

Darius P. Zlotos,\*<sup>a</sup> Yasmine M. Mandour<sup>b</sup> and Anders A. Jensen<sup>c</sup>

<sup>a</sup> Department of Pharmaceutical Chemistry, Faculty of Pharmacy and Biotechnology, The German University in Cairo, New Cairo City, 11835 Cairo, Egypt

<sup>b</sup> School of Life and Medical Sciences, University of Hertfordshire hosted by Global Academic Foundation, New Administrative Capitol, Cairo, Egypt

<sup>c</sup> Department of Drug Design and Pharmacology, Faculty of Health and Medical Sciences, University of Copenhagen, DK-2100 Copenhagen, Denmark

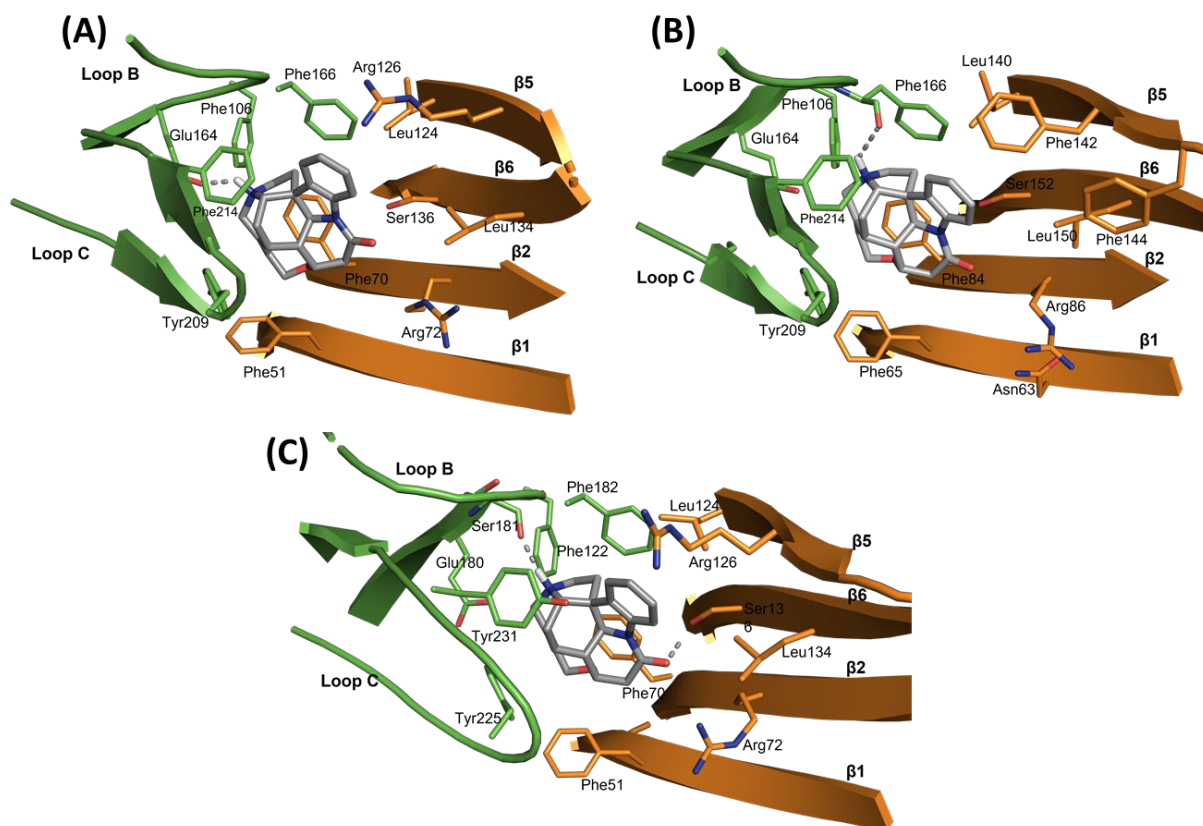

**Figure S1.** Binding mode of Strychnine at the orthosteric binding site at the (A)  $\alpha/\alpha$ , (B)  $\alpha/\beta$  and (C)  $\beta/\alpha$  interfaces in the cryo-EM structure of heteromeric  $\alpha_2/\beta$  GlyR (PDB: 7KUY)<sup>113</sup>. With the exception of Tyr231 in loopC of the principal subunit and Phe142 of  $\beta 5$  sheet of the complementary subunit, all orthosteric binding site residues are identical among the  $\alpha$ - and  $\beta$ -subunits of GlyRs.

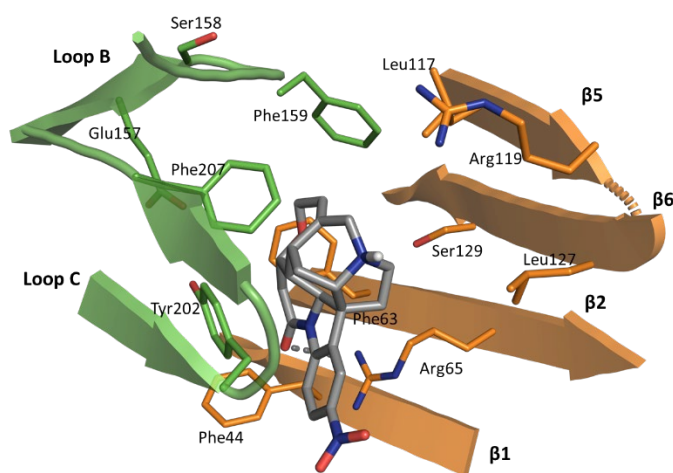

**Figure S2** Docked pose of 2-nitrostrychnine **37** in the orthosteric binding site of homomeric  $\alpha_3$  GlyR (PDB code: 5CFB)<sup>111</sup>. Only side chain atoms are shown for clarity.

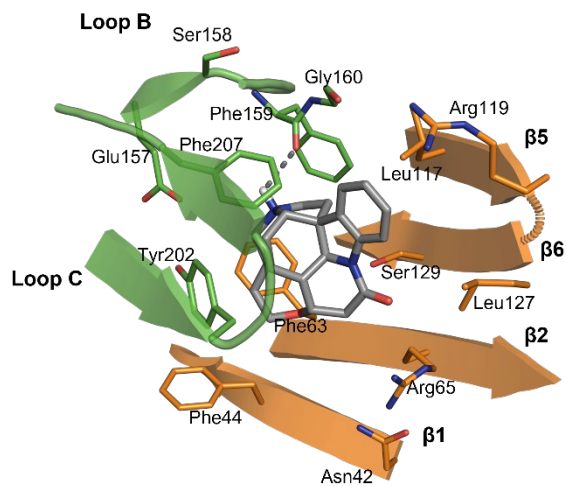

**Figure S3.** Docked pose of 21,22 dihydrostrychnine **17** in the orthosteric binding site of homomeric  $\alpha 3$  GlyR (PDB code: 5CFB)<sup>111</sup>. Only side chain atoms are shown for clarity.

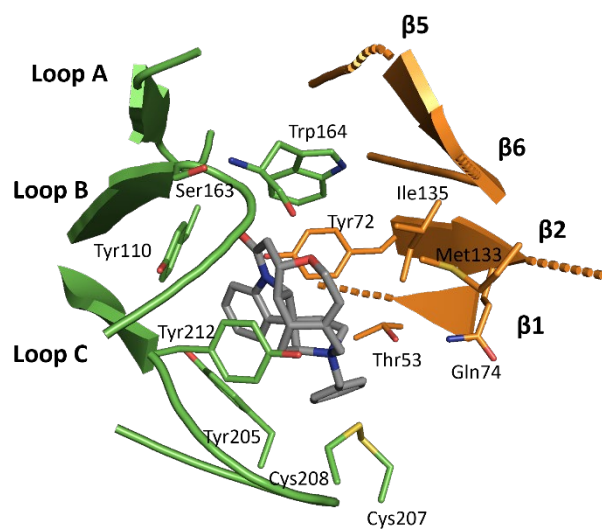

**Figure S4.** Docked pose of **34c** in the orthosteric binding site of AcAChBP (PDB code: 5O8T)<sup>155</sup>. Only side chain atoms are shown for clarity.
